# Supplementary material for: The RNA-binding protein LIN28 controls progenitor and neuronal cell fate during postnatal neurogenesis
Source: PubMed Central journal article supplement — FASEB J. 2018 Nov 13;33(3):3291–303. doi: 10.1096/fj.201801118R (PMC6404560; doi:10.1096/fj.201801118r), 2018-11-13
Supplement: fj.201801118R.sd1.pdf [file fj.201801118R.sd1.pdf]

## Supplemental Figures and Tables

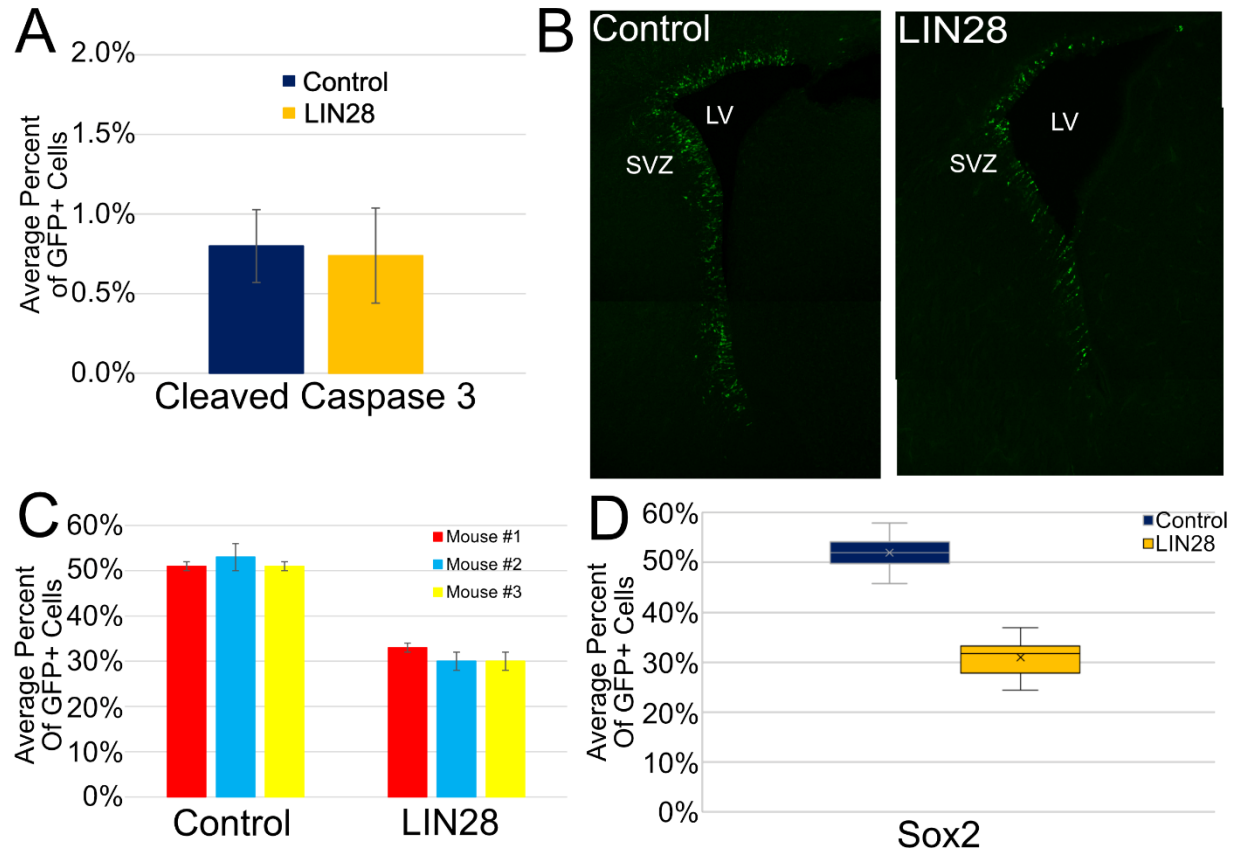**Figure S1 – Assessment of variability and effect of the LIN28::GFP plasmid.**

A) Average percent of GFP+ cells positive for cleaved caspase 3, a marker for apoptosis, at 3 DPE. n = 7 slices.

B) Representative 10x micrographs depicting GFP+ electroporated cells in the dorsal and lateral SVZ regions in control (left) and LIN28 (right) at 1 DPE. LV, lateral ventricle; SVZ, subventricular zone; dorsal, up; lateral, left.

C) Bar graph depicting variability from mouse to mouse in both control and LIN28. Average percent of GFP+ cells positive for Sox2 from four slices per mouse, three mice.

D) Box and whisker plot showing variability between slices of different mice n = 12 slices.

Average percent of GFP+ cells positive for Sox2.

In A, C, and D, data presented as mean  $\pm$  S.E.M, Student's *t*-test. n.s., not significant.

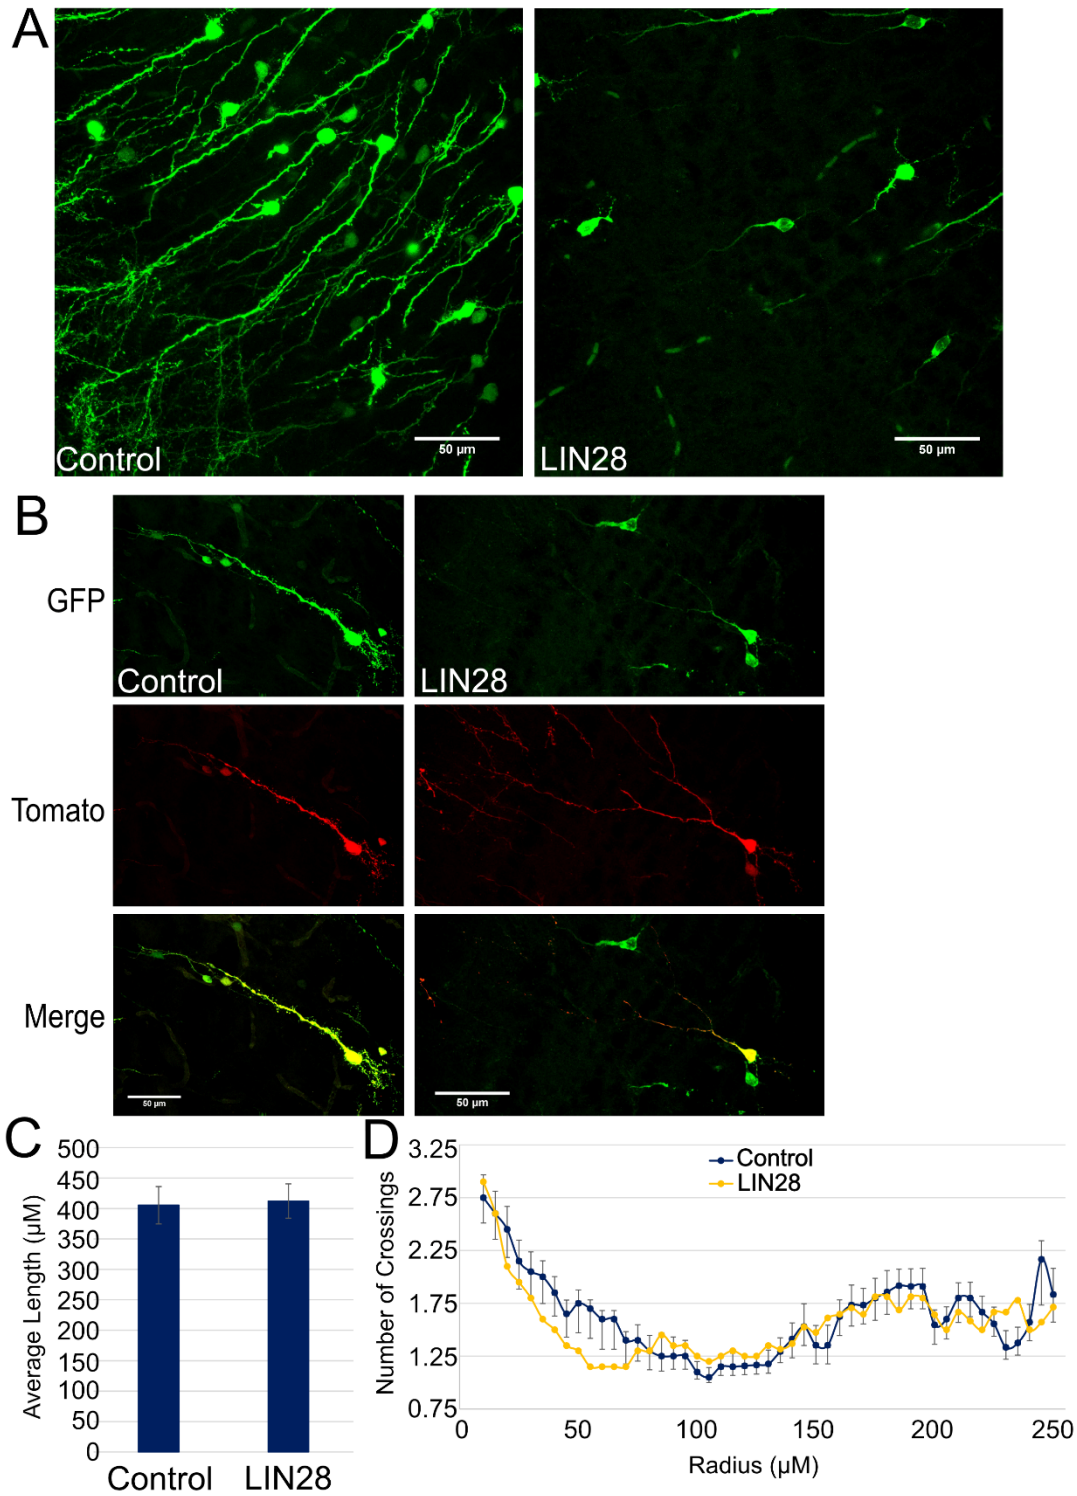

**Figure S2 - LIN28 does not localize to the apical dendrites of granule neurons nor does it appear to affect dendritic morphology in the OB at 21 DPE.**

A) Representative 40x micrographs depicting GFP+ (green) neurons in control (left) and LIN28 (right) at 21 DPE. Scale bars: 50μM.

B) Representative 40x micrographs depicting GFP+ (green), tdTomato+ (red), and the overlap (yellow) of these two fluorescent markers in control (left) and LIN28 (right) neurons at 21 DPE. Scale bars: 50 $\mu$ M.

C) Bar graph depicting the average length of 21 DPE OB neurons. Analysis completed using the NeuronJ function of Fiji Image J. n = 20 neurons from 3 mice.

D) Scatter plot of Sholl analysis depicting the average number of crossings from the soma of 21 DPE neurons at 5 micron intervals. Analysis completed using the Sholl Analysis function of Fiji Image J. n = 20 neurons from 3 mice.

In C and D, data presented as mean  $\pm$  S.E.M. C: Student's *t*-test. D: Two way ANOVA. n.s., not significant.

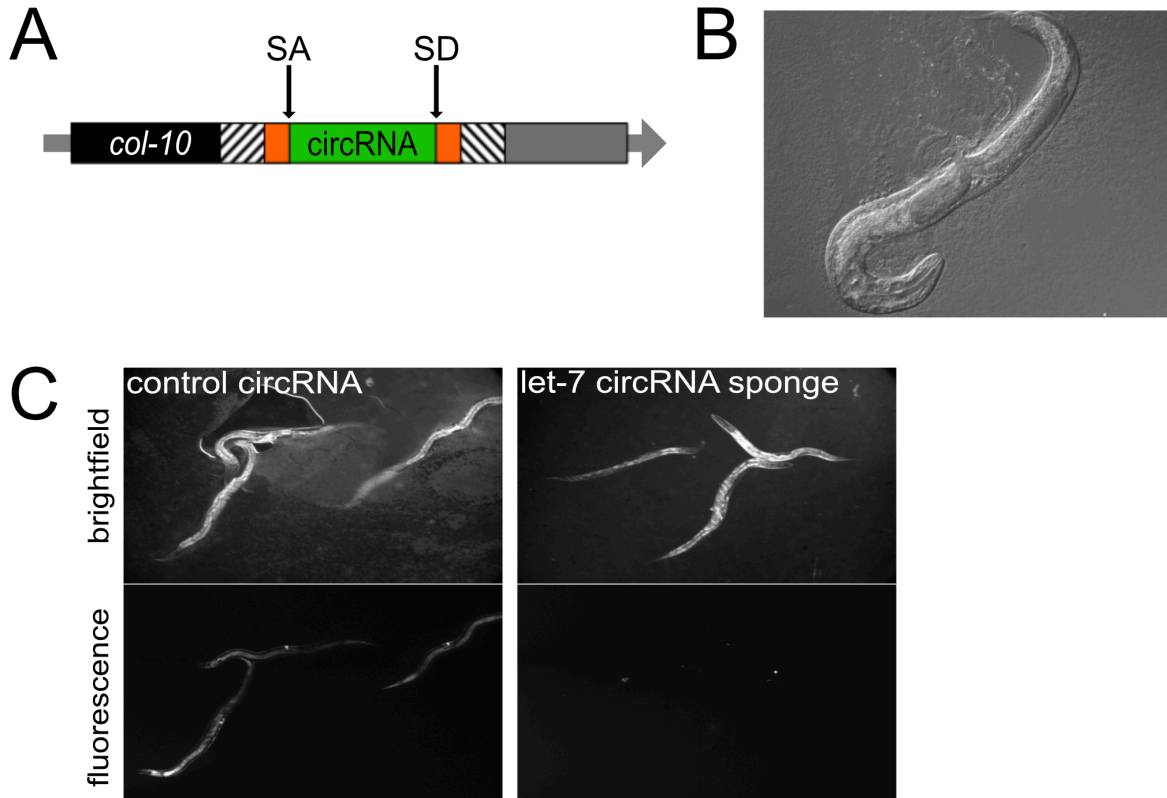

**Figure S3 - A *let-7* circRNA sponge effectively knocks down *let-7* activity in *C. elegans*.**

A) The circRNA-expressing constructs for *C. elegans*. The RNA is expressed from the *col-10* promoter, a constitutive epidermal promoter. Hatched regions indicate inverted repeat to form hairpin. SA, splice acceptor; SD, splice donor.

B) Micrograph of a *let-7* circRNA sponge worm displaying adult bursting phenotype characteristic of a *let-7* mutant.

C) Adult *C. elegans* expressing control circRNA and *let-7* circRNA sponge *col-19::GFP* adult-specific reporter in brightfield (top) and fluorescence (bottom). Sponge expressing animals express a co-injection marker (*ttx-3::GFP*) but not the adult-specific marker (*col-19::GFP*).

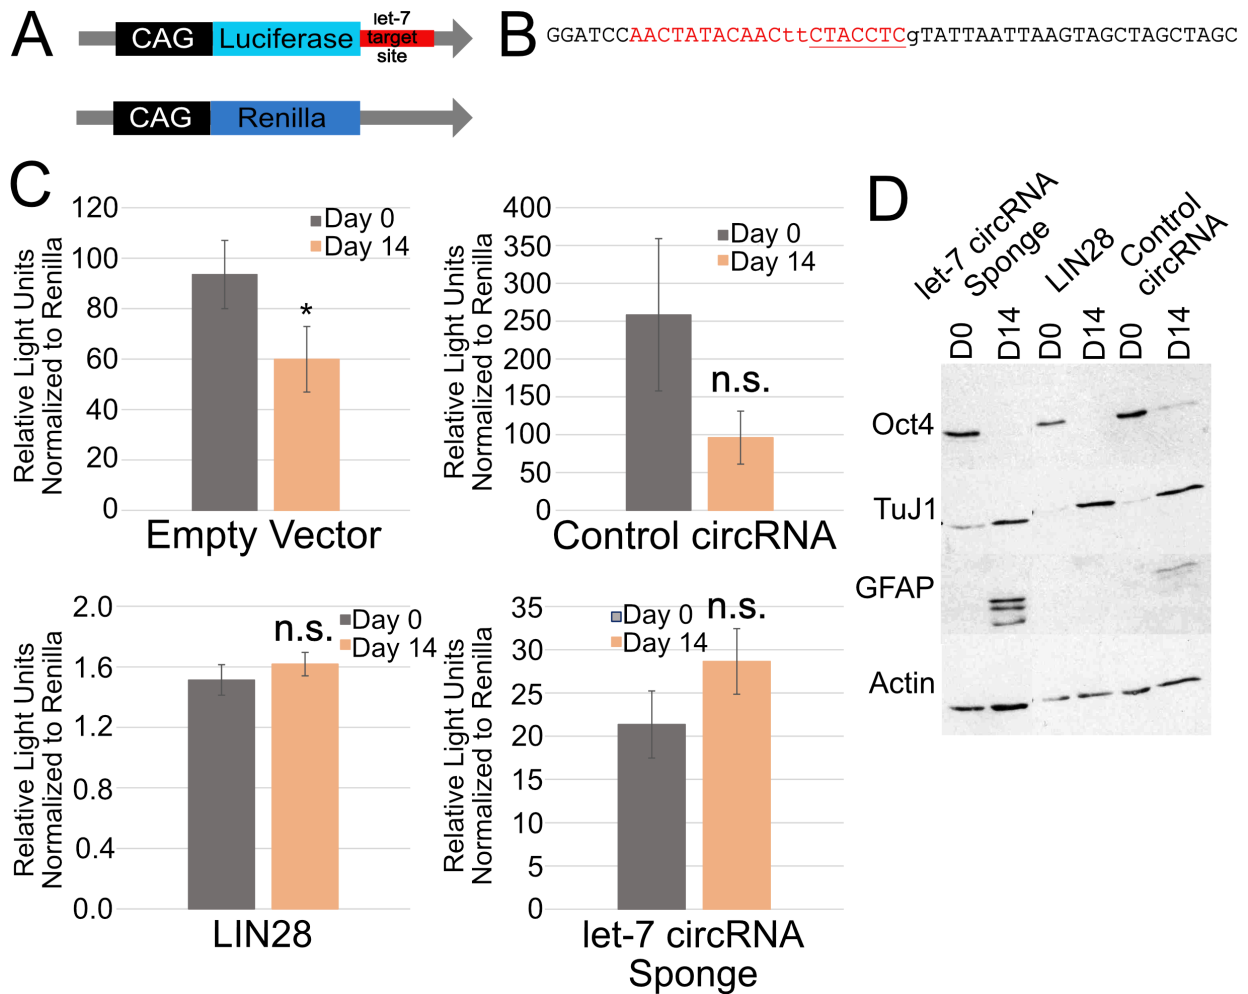

**Figure S4 - The let-7 circRNA sponge blocks let-7 activity in P19 cells.**

A) Diagram illustrates the luciferase reporter plasmid construct (top) and the renilla plasmid construct (bottom). Both open reading frames are expressed under the CAG promoter. The luciferase reporter contains a let-7A target site in the 3'UTR.

B) Let-7 target sight design. Red, microRNA target sequence; the seed sequence is underlined.

C) Bar graphs depicting the luciferase assay. Luciferase levels were normalized to its own internal renilla expression.  $n = 3-4$  differentiations per cell line.

D) Representative western blot showing the results of gliogenesis in the various P19 cell lines. D0, day 0; D14, day 14. Oct4, pluripotency marker; TuJ1, neuron marker. Actin was used as the loading control.  $n = 3-4$  differentiations per cell line.

In C, data presented as mean  $\pm$  S.E.M. \*,  $p \leq 0.05$  versus control, paired  $t$ -test. n.s., not significant

**Table S1.** The the sequence of the let-7 circRNA construct with target sites aligned.

|                    |
|--------------------|
| CTTATACAGACCTACCTC |
| ACTATACAGATCTACCTC |
| ACTATACAAATCTACCTC |
| ACTATGCAGCCCTACCTC |
| TCTATATAAACCTACCTC |
| AATATGTAAACCTACCTC |
| ACTATGTAAACCTACCTC |
| TCTATACAGATCTACCTC |
| ACTGTACAAATCTACCTC |
| ACTATGCAACCCTACCTC |
| ATTATACAAACCTACCTC |
| ACTGTACAACCTACCTC  |
| ACTATACACACCTACCTC |
| ACTATACAAGTCTACCTC |
| ACTGTACAAATCTACCTC |
| ACTATATAAATCTACCTC |
| ACTATACAAATCTACCTC |
| ACTGTATAACTCTACCTC |
| ATTATGCAGACCTACCTC |
| TCTGTACAGATCTACCTC |
| AATATGCAAACCTACCTC |
| ACTATACAAACCTACCTC |
| ATTGTACAAATCTACCTC |
| ACTGTACAAATCTACCTC |
| ACTATGCAAACCTACCTC |
| TTTATGCAGGCCTACCTC |
| ACTGTACAAGTCTACCTC |
| ACTATACACACCTACCTC |
| ACTATATAGACCTACCTC |
| ACTATACAAATCTACCTC |
| ACTATGCACACCTACCTC |
| ATTGTACAGATCTACCTC |
| ACTATACAGCTCTACCTC |
| ACTATACAAACCTACCTC |
| ACTGTACAAATCTACCTC |
| ATTATACAACCCTACCTC |

**Table S2.** The *let-7* sponge phenocopies a *let-7(0)* phenotype.

| Genotype                    | Young Adults with Adult Lateral Alae | Death by Bursting |
|-----------------------------|--------------------------------------|-------------------|
| Wildtype                    | 100% (n=22)                          | 0% (n=30)         |
| <i>let-7(0)</i>             | 0% (n=30)                            | 100% (n=20)       |
| <i>let-7</i> circRNA sponge | 0% (n=30)                            | 100%* (n=20)      |
| Control circRNA             | 100% (n=10)                          | 0%* (n=20)        |

\*Transgenic animals carrying the circRNA construct and a GFP co-transformation marker were first selected as bright GFP+ L4 stage larvae then monitored for bursting.
